# Supplementary material
Source: PubMed Central journal article supplement (PMC11089467)
Supplement: jama-e244467-s002.pdf [file jama-e244467-s002.pdf]

## Data Sharing Statement

Selvaraj. Cardiovascular Burden of the V142I Transthyretin Variant. *JAMA*. Published May 12, 2024. doi:10.1001/jama.2024.4467

### Data

**Data available:** No

### Additional Information

**Explanation for why data not available:** These data are available from the individual cohort studies, which may be requested from them and provided with the appropriate approval.
